1 **Sexual identity of enterocytes regulates rapamycin-mediated**  
2 **intestinal homeostasis and lifespan extension**

3

4 **Jennifer C Regan<sup>1,3\*†</sup>, Yu-Xuan Lu<sup>2\*†</sup>, Enric Ureña<sup>1</sup>, Ralf Meilenbrock<sup>2</sup>, James H**  
5 **Catterson<sup>1</sup>, Disna Kibler<sup>2</sup> and Linda Partridge<sup>1,2\*</sup>**

6 1. Institute of Healthy Ageing, Department of Genetics, Evolution and Environment, University College  
7 London, Gower St, London WC1E 6BT, UK.

8 2. Max Planck Institute for Biology of Ageing, Joseph-Stelzmann-Straße 9b, 50931 Cologne, Germany.

9 3. Institute of Immunology and Infection Research, University of Edinburgh, Charlotte Auerbach Road,  
10 Edinburgh, EH9 3FL, UK.

11 † These authors contributed equally

12 \* For correspondence: [jenny.regan@ed.ac.uk](mailto:jenny.regan@ed.ac.uk); [ylu@age.mpg.de](mailto:ylu@age.mpg.de); [partridge@age.mpg.de](mailto:partridge@age.mpg.de)

13

14

15 **Abstract**

16 Pharmacological attenuation of mTOR by rapamycin and other compounds presents a  
17 promising route for delay of ageing-related pathologies, including intestinal cancers. Here, we  
18 show that rapamycin treatment in *Drosophila* extends lifespan in females but not in males.  
19 Female-specific, age-related gut pathology and impaired intestinal barrier function are both  
20 markedly slowed by rapamycin treatment, mediated by increased autophagy. Upon rapamycin  
21 treatment, female intestinal enterocytes increase autophagy, via the H3/H4 histone-Bchs axis,  
22 while male enterocytes show high basal levels of autophagy that do not increase further upon  
23 rapamycin treatment. Sexual identity of enterocytes alone, determined by the expression of  
24 *transformer<sup>Female</sup>*, dictates sexually dimorphic cell size, H3/H4-*Bchs* expression, basal rates of  
25 autophagy, fecundity, intestinal homeostasis and extension of lifespan in response to  
26 rapamycin. This study highlights that tissue sex determines regulation of metabolic processes  
27 by mTOR and the efficacy of mTOR-targeted, anti-ageing drug treatments.

28 **Main**

29 Sex differences in lifespan are almost as prevalent as sex itself <sup>1,2</sup>. Women are the longer-  
30 lived sex in humans, in some countries by an average of >10 years, and yet bear a greater  
31 burden of age-related morbidities than do men <sup>3</sup>. Many aspects of human physiology that  
32 affect homeostasis over the life course show profound sex differences, including metabolism  
33 <sup>4</sup>, responses to stress <sup>5</sup>, immune responses and auto-inflammation <sup>6-8</sup> and the rate of decline of  
34 circulating sex steroid hormones (menopause and andropause) <sup>9</sup>. These physiological  
35 differences lead to different risks of developing age-related diseases, including heart disease,  
36 cancer, and neurodegeneration <sup>10,11</sup>. Sex differences can also determine responses to  
37 pharmacological treatments <sup>12</sup>; potentially both acutely, by regulating physiology and  
38 metabolism, and chronically, by influencing the type and progression of tissue pathology.  
39 Understanding how sex influences both development of age-related disease and responses to  
40 treatment will be key to move forward with the development of geroprotective therapeutics.

41

42 Greater longevity in females than in males is prevalent across taxa <sup>1,2,13</sup>. Evolutionary drivers  
43 for sex differences in longevity include mating systems, physical and behavioural  
44 dimorphisms and consequent differences in extrinsic mortality, sex determination by  
45 heterogametism, and mitochondrial selection <sup>1,2,13,14</sup>. Studies in laboratory model systems can  
46 help uncover the mechanisms leading to sexual dimorphism in longevity. Lifespan is a  
47 malleable trait, and genetic, environmental and pharmacological interventions can ameliorate  
48 the effects of ageing. These interventions often target highly conserved, nutrient-sensing  
49 signalling pathways, and their effects are frequently sex-specific <sup>12,15</sup>. We have previously  
50 shown that dietary restriction (DR) extends lifespan more in female than in male *Drosophila*  
51 *melanogaster*, at least in part by targeting a dimorphic decline in gut physiology, which is  
52 much more evident in females <sup>16</sup>. DR influences nutrient sensing pathways such as

53 IIS/mTOR, and targeting these pathways directly offers a more translational route for anti-  
54 ageing therapy than do chronic dietary regimes<sup>17-20</sup>.

55

56 mTOR is a highly conserved signalling hub that integrates multiple cues to regulate key  
57 cellular functions, including cell growth, division, apoptosis, and autophagy. The mTOR  
58 complex 1 (mTORC1) is activated by both nutrients and growth factors such as EGF and IIS,  
59 via PI3K and Akt, such that it responds to both organismal and intracellular energy status<sup>21</sup>.

60 Attenuation of mTORC1 activity genetically by a null mutation in the mTORC1 substrate  
61 Ribosomal protein *S6 kinase beta-1 (S6K1)* gene increases lifespan in female, but not male,  
62 mice<sup>22</sup>. Pharmacological inhibition of mTORC1 by rapamycin is currently the only  
63 pharmacological intervention that extends lifespan in all major model organisms<sup>17,19,23</sup>.

64 Rapamycin extends lifespan in mice, but the effects are also sexually dimorphic<sup>24</sup>. Chronic  
65 treatment of genetically heterogenous mice, tested at 3 locations, showed moderate lifespan  
66 extensions<sup>24,25</sup>, where the magnitude of extension differed substantially between the sexes.

67 Interestingly, a subsequent study demonstrated sexually dimorphic effects on ageing  
68 pathologies, specifically cancer incidence and type<sup>26</sup>. The physiological bases for these  
69 dimorphic responses to mTOR-attenuation are not well-understood. Chronic treatment with  
70 rapamycin extends lifespan significantly more in female *Drosophila melanogaster* than in  
71 males<sup>27</sup>, and attenuates development of age-related gut pathologies in *Drosophila* females<sup>28</sup>.

72 However, the effect of rapamycin on ageing pathology in *Drosophila* males is unknown.

73

74 Here, we show that treatment with rapamycin extends lifespan in female flies only. Intestinal  
75 ageing in females is attenuated by rapamycin treatment, through up-regulation of autophagy  
76 in enterocytes. There are strong dimorphisms in baseline metabolic regulation of intestinal  
77 cells, whereby male enterocytes appear to represent an intrinsic, minimal limit for cell size

78 and an upper limit for autophagy, neither of which are pushed further by rapamycin treatment.

79 By manipulating genetic determination of tissue sex, we show that sexual identity of

80 enterocytes determines physiological responses to mTOR attenuation, including homeostatic

81 maintenance of gut health and function, and lifespan, through autophagy activation by the

82 histones-Bchs axis <sup>29</sup>. These data show the importance of cellular sexual identity in

83 determining baseline metabolism, consequent rates of tissue ageing, and responses to anti-

84 ageing interventions.

85

86

## 87 **Results**

### 88 **Rapamycin treatment extends lifespan in females but not in males**

89 We treated  $w^{Dah}$  adult flies of both sexes with 200  $\mu$ M rapamycin added to the food medium.  
90 At this dose, females, as expected<sup>27</sup>, showed a significant increase in lifespan, while males  
91 did not (Fig 1a). Given that male flies eat less than females<sup>30,31</sup>, and hence may ingest less of  
92 the drug, we fed females and males rapamycin at three concentrations, 50, 200 and 400  $\mu$ M,  
93 in the food medium. Females showed significantly extended lifespan at all three doses of the  
94 drug (Fig S1), but males showed no increase at any dose (Fig 1b). To test whether the  
95 sexually dimorphic response of lifespan to rapamycin treatment generalised across fly  
96 genotypes, we tested the response in the *Dahomey (Dah)* line (from which  $w^{Dah}$  was originally  
97 derived), and in a genetically heterogenous fly line derived by in-crossing all lines that make  
98 up the *Drosophila Genetic Resource Panel (DGRP-OX)*<sup>32</sup>. Similar to  $w^{Dah}$ , we observed  
99 significant lifespan extension in females, but not in males in both of these lines (Fig S2a,b).  
100 Inhibition of mTOR by rapamycin may, therefore, confer a beneficial effect in females that is  
101 absent in males. Alternatively, any beneficial physiological effect(s) in males may be  
102 counteracted by negative effects, resulting in no net change to lifespan, or males may be  
103 unable to respond to rapamycin treatment. To determine if male tissues are sensitive to  
104 inhibition of mTORC1 by rapamycin, we measured phosphorylated S6K (p-S6K) levels in  
105 dissected intestines (Fig 1c) and fat body tissue (Fig 1d) in males and females. Both sexes  
106 showed a significant reduction in p-S6K levels in both tissues in response to rapamycin, and  
107 there was no significant interaction between sex and treatment. The dimorphic response of  
108 lifespan to rapamycin was therefore likely not due to sex differences in suppression of  
109 mTORC1 signalling by the drug.

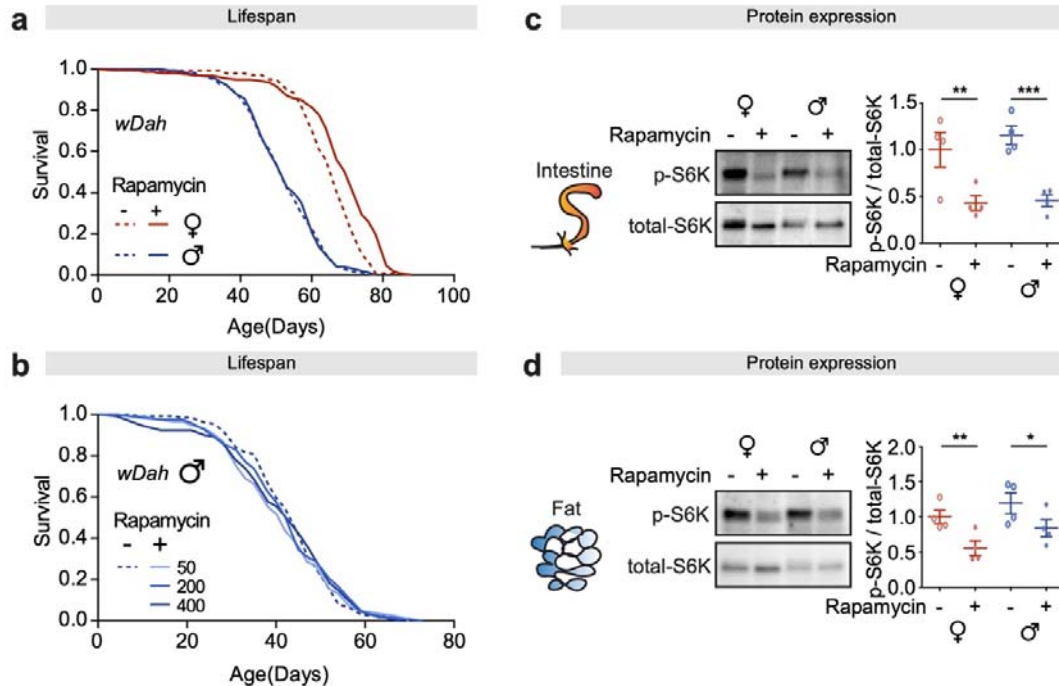

110

111 **Figure 1. Rapamycin treatment extends lifespan in  $w^{Dah}$  females only, but reduces**  
 112 **phosphorylation of S6K in both sexes.**

113 **a**, Adult-onset rapamycin treatment (200  $\mu$ M) extended the lifespan of  $w^{Dah}$  females but not  
 114 males (log-rank test, females  $p=2.1E-06$ , males  $p=0.77$ ,  $n>140$  flies). See also Table S1 for  
 115 Cox PH analysis.

116 **b**, Adult-onset rapamycin treatment at three concentration (50, 200 and 400  $\mu$ M) did not  
 117 extend the lifespan of  $w^{Dah}$  males (log-rank test, 50  $\mu$ M  $p=0.60$ , 200  $\mu$ M  $p=0.75$ , 400  $\mu$ M  $p=1$ ,  
 118  $n >110$  flies). See also Table S2.

119 **c-d**, The level of phospho-S6K in the intestine and the fat body was substantially reduced by  
 120 rapamycin treatment both in females and males. ( $n = 4$  biological replicates of 10 intestines  
 121 per replicate, two-way ANOVA, interaction  $p>0.05$ ; post-hoc test,  $*p<0.05$ ,  $**p<0.01$ ,  
 122  $***p<0.001$ ).

123

124

125

126

127 **Age-related gut pathology is reduced in females treated with rapamycin**

128 Dietary restriction attenuates female-specific, age-related intestinal pathologies in *Drosophila*,  
129 leading to a greater extension of lifespan in females than in males <sup>16</sup>. We therefore  
130 investigated the effect of rapamycin on age-related decline in the structure and function of the  
131 gut. Small tumour formation and resulting dysplastic pathology can be quantified by assessing  
132 proportion of the intestinal epithelium which is no longer maintained as a single layer <sup>29,33</sup>. In  
133 parallel with pathological changes analysed by imaging, gut barrier function can be assessed  
134 using well-described methods to detect the onset of gut leakiness <sup>34,35</sup>. As previously reported  
135 <sup>16,28,29</sup>, females treated with rapamycin showed a strong attenuation of dysplastic epithelial  
136 pathology (Fig 2a) and intestinal stem cell (ISC) mitoses (<sup>36</sup>; Fig S3a,b), in parallel with better  
137 maintenance of barrier function (Fig 2b). In contrast, male flies showed only low levels of  
138 ISC mitoses, and intestinal pathology, and these were not reduced by rapamycin treatment  
139 (Fig 2a,b; Fig S3a,b) <sup>37</sup>.

140

141 **The size and composition of the microbiome is sex- and age-dependent but does not**  
142 **change significantly upon treatment with rapamycin**

143 Age-related shifts in the luminal microbial community can drive epithelial pathology in  
144 female *Drosophila*, due to the expansion of pathogenic bacterial species at the expense of  
145 commensals <sup>38</sup>. Attenuation of the mTOR pathway by rapamycin influences composition of  
146 the microbiome in mammals <sup>26</sup>. However, recent data demonstrated that chronic rapamycin  
147 treatment did not affect the microbiome in *Drosophila* females, at least under certain  
148 laboratory and diet conditions <sup>39</sup>. To investigate a role for the bacterial microbiome in  
149 mediating sex differences in the responses to rapamycin under our laboratory conditions, we  
150 deep-sequenced the gut microbiome in young- and middle-aged flies of both sexes treated

151 chronically with rapamycin. We found significant sex dimorphisms in load (Fig S4a) and  
152 composition (Fig S4b) of the microbiota, and these interacted with age. The load in old male  
153 flies increased by an order of magnitude compared with young male flies (Fig S4a), and this  
154 increase was confirmed by quantifying *Acetobacter pomorum* transcripts relative to a  
155 *Drosophila* standard. No comparable increase was seen in females, either by assessing overall  
156 load, or load of *A. pomorum*. Rapamycin treatment did not significantly affect either load (Fig  
157 S4a) or composition (Fig S4b) in either sex, suggesting that the sexually dimorphic effects of  
158 rapamycin treatment were not achieved through remodelling of the microbiome.

159

#### 160 **Intestinal cell size is reduced in females but not in males following rapamycin treatment**

161 TOR plays a central role in regulating antagonistic anabolic and catabolic processes, and  
162 inhibition by rapamycin concomitantly decreases cell size and up-regulates autophagy<sup>40,41</sup>.  
163 We fed rapamycin at doses between 50  $\mu$ M and 400  $\mu$ M in the food medium and measured  
164 cell size after two weeks of treatment (Fig 2c). Enterocyte size in untreated males was  
165 significantly smaller than in untreated females, as expected<sup>16</sup>, and was not significantly  
166 responsive to rapamycin treatment (Fig 2c). In contrast, treatment at 50mM reduced  
167 enterocyte size in females, to a size approximately 75% of that in control females and very  
168 similar to that in untreated males (Fig 2c), with no further reduction at 4x (200mM) or 8x  
169 (400mM) higher doses. Enterocyte size in females thus reached a minimum size, similar to  
170 that in untreated males, at a relatively low dose of rapamycin.

171

#### 172 **Enterocytes in males have higher levels of basal autophagy that are not further** 173 **increased by rapamycin treatment**

174 Inhibition of mTORC1 by nutrient starvation, stress, or pharmacological inhibition increases  
175 autophagy<sup>21,40</sup>. Autophagy can be measured *in vivo* in several ways, including Western blot



176 analysis of the lipidated form of the Atg8a protein (Atg8a-II), the fly ortholog of mammalian  
177 LC3. There was a striking sex dimorphism in basal levels of autophagy, with Atg8a-II protein  
178 levels higher in dissected intestines from untreated males than females (Fig 2d). Rapamycin  
179 treatment substantially increased Atg8a-II in female intestines to levels similar to those in  
180 untreated males, while it had no significant effect on males (Fig 2d). To further confirm this  
181 result, we performed co-stainings with Lysotracker and Cyto-ID, which selectively label  
182 autophagic vacuoles, to assess the autophagic flux. An increased number of Lysotracker  
183 puncta indicates that autophagic flux is increased or blocked, while an increase in the number  
184 of Cyto-ID puncta indicates that flux is blocked<sup>29,42,43</sup>. The number of Lysotracker-stained  
185 puncta in untreated female intestines was significantly lower than in males (Fig 2e), and when  
186 treated with rapamycin increased to levels that did not differ significantly from the basal level  
187 in males, while there was no increase in male intestines (Fig 2e). Neither sex nor rapamycin  
188 treatment affected the number of Cyto-ID puncta (Fig 2e), suggesting autophagic flux was not  
189 blocked. Taken together, these results demonstrate that males had higher basal levels of  
190 autophagy than did females, and that only in females was there an increase in response to  
191 rapamycin, which brought autophagy to similar levels to those seen in males.

192

193

194

195

196

197

198

199

200

201

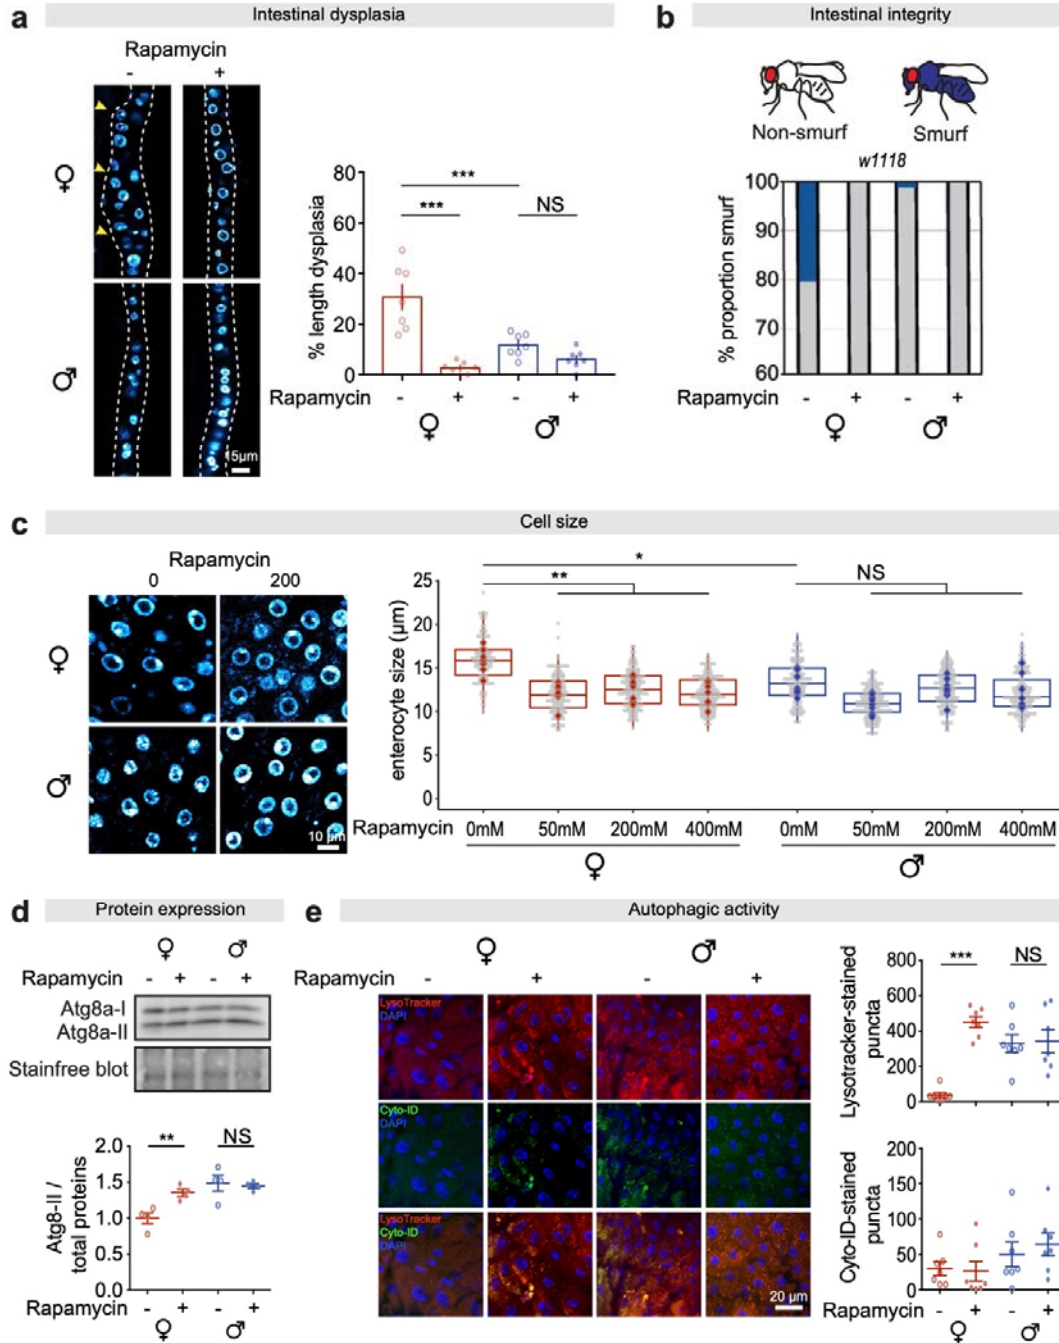

202

203 **Figure 2. Rapamycin treatment reduces age-related gut pathology and enterocyte size,**

204 **and elevates autophagy and barrier integrity in females but not in males.**

205 **a**, Females showed greater age-related dysplasia in aged guts, which was attenuated by  
206 rapamycin treatment, at 50 days of age. (n = 7 intestines, two-way ANOVA,  
207 interaction \*\*\*p<0.001; post-hoc test, \*\*\*p<0.001).

208 **b**, Females had a higher number of flies suffering barrier function decline (Smurfs) than  
209 males, and showed increased barrier function in response to rapamycin, at 60 days of  
210 age. (n>150, Fishers exact test).

211 **c**, Cell size of enterocytes in females was larger than in males, and declined to the same size  
212 as in males in response to rapamycin treatment (50, 200 and 400  $\mu$ M) (n = 6-8 intestines, n  $\geq$   
213 10 enterocytes per intestine, circles indicate individual values and diamonds represent  
214 the average value per intestine; linear mixed model, interaction p<0.01; post-hoc test, NS  
215 p>0.05, \*p<0.05, \*\*p<0.01).

216 **d**, The expression of Atg8a-II in the gut of females was lower than in males, and rapamycin  
217 treatment increased it to the level in males (n = 4 biological replicates of 10 intestines per  
218 replicate, two-way ANOVA, interaction p<0.01; post-hoc test, NS p>0.05, \*\*p<0.01).

219 **e**, The number of Lysotracker-stained puncta in the gut of females was lower than in males,  
220 and rapamycin increased it to the level seen in males. Neither sex nor rapamycin had an effect  
221 on the number of Cyto-ID-stained puncta in the intestine (n = 7 intestines per condition; n =  
222 2-3 pictures per intestine, data points represent the average value per intestine; linear mixed  
223 model, interaction Lysotracker-stained puncta, p<0.001, Cyto-ID-stained puncta, p>0.05;  
224 post-hoc test, NS p>0.05, \*\*\*p<0.001).

---

225

226

227 **Suppressing autophagy in enterocytes reduces barrier function and decreases lifespan in**  
228 **males**

229 To probe the role of increased basal autophagy levels in males, we genetically suppressed the  
230 process, by expressing RNA interference (RNAi) against the essential autophagy gene *Atg5* in  
231 adult enterocytes, using the Geneswitch system<sup>44</sup>; *5966GS>Atg5<sup>[RNAi]</sup>*. In line with our  
232 previous result (Fig 2e), males showed markedly higher basal levels of intestinal autophagy  
233 than did females (Fig 3a). Knock-down of *Atg5* reduced the number of Lysotracker-stained  
234 puncta in males to similar levels as in females, while females showed no response (Fig 3a).

235

236 Autophagy maintains homeostasis of ageing tissues, and its manipulation can affect lifespan  
237<sup>45,46</sup>. Indeed, gut barrier function was reduced in aged male flies with suppressed autophagy,  
238 to levels similar to those seen in females (Fig 3b). In contrast, expression of *Atg5<sup>[RNAi]</sup>* had no  
239 effect on barrier function in female flies (Fig 3b), likely due to the lack of response of their  
240 already low levels of intestinal autophagy to knock-down of *Atg5*. Development of dysplasia  
241 was also significantly increased in aged *5966GS>Atg5<sup>[RNAi]</sup>* males compared to controls, but  
242 again there was no significant effect in females (Fig 3c). Interestingly, when we analysed ISC  
243 proliferation in 20-day old flies, we did not see an up-regulation of mitoses in male flies with  
244 suppressed autophagy in enterocytes (Fig 3d). This suggests that the dysplasia we observed in  
245 these flies was the cumulative effect of disrupted differentiation of ISCs or enteroblasts,  
246 arising as a non-cell autonomous effect of decreased autophagy in neighbouring enterocytes,  
247 rather than a consequence of increased proliferation. RNAi against *Atg5* in enterocytes  
248 significantly decreased lifespan in male flies, but had no effect in females (Fig 3e). These data  
249 reveal the dimorphic regulation of autophagy in enterocytes and its impact on gut pathology  
250 and lifespan: females have low basal levels autophagy which increase in response to  
251 rapamycin treatment, with a consequent reduction in gut pathology and increase in lifespan,  
252 whereas males with high basal autophagy see an increase in gut pathology and a reduction in  
253 lifespan upon its suppression.

254

255

256

257

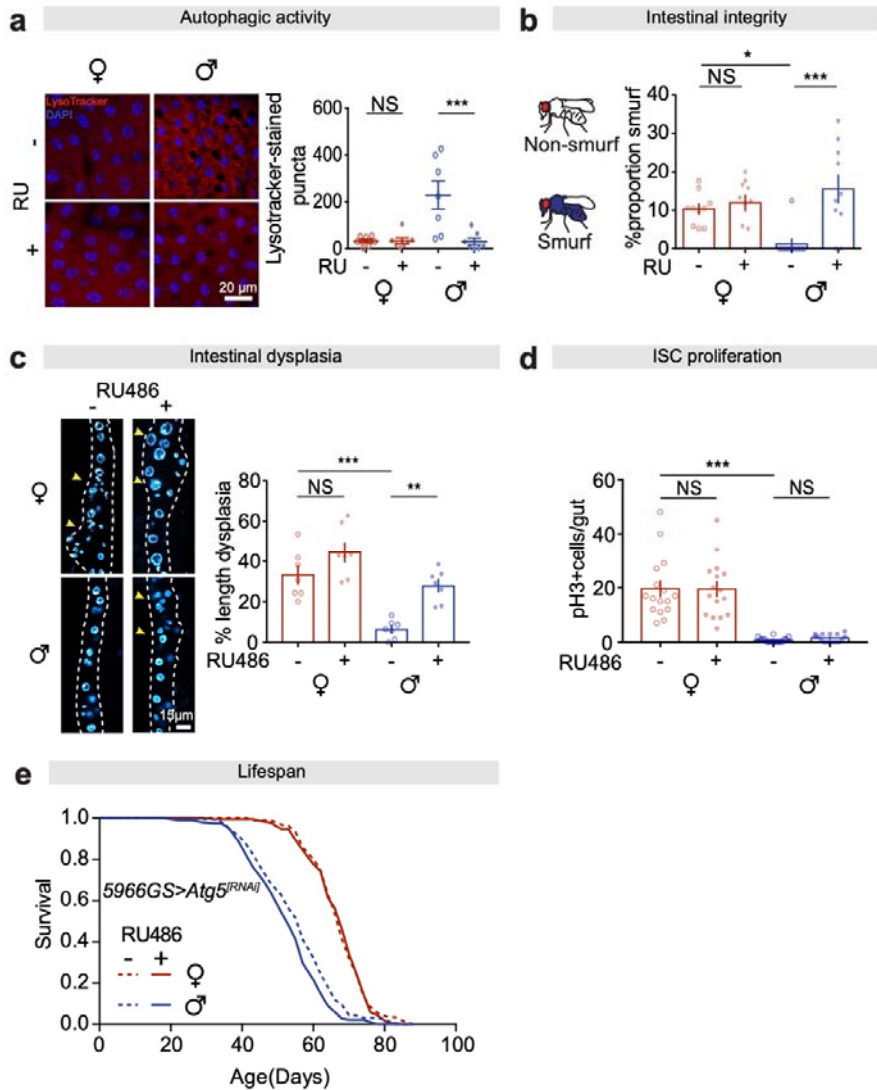

258

259 **Figure 3. Autophagy in gut enterocytes regulates gut pathologies and lifespan.**

260 **a**, Adult-onset knock-down of *Atg5* in adult ECs did not affect the number of Lysotracker-

261 stained puncta in the gut of females, but decreased it in the gut of males to the level in

262 females, at 20 days of age. (n = 7 intestines per condition; n = 2-3 pictures per intestine, data

263 points represent the average value per intestine; linear mixed model, interaction  $p < 0.01$ ; post-  
264 hoc test, NS  $p > 0.05$ , \*\*\* $p < 0.001$ ).

265 **b**, Females had a higher number of Smurfs than males, and adult-onset knock-  
266 down of *Atg5* in adult ECs in males significantly increased the number of Smurfs, to the level  
267 in females at 60 days of age. Bar charts show  $n = 10$  biological replicates of 8-20 flies per  
268 replicate (two-way ANOVA, interaction  $p < 0.01$ ; post-hoc test, NS  $p > 0.05$ , \* $p < 0.05$ ,  
269 \*\*\* $p < 0.001$ ).

270 **c**, Adult-onset knock-down of *Atg5* in adult ECs did not affect the level of dysplasia in the gut  
271 of females, but increased it in the gut of males to the level in females, at 50 days of age. ( $n$   
272 = 7 intestines, two-way ANOVA, interaction  $p > 0.05$ ; post-hoc test, NS  $p > 0.05$ ,  
273 \*\* $p < 0.01$ , \*\*\* $p < 0.001$ ).

274 **d**, Adult-onset knock-down of *Atg5* in adult ECs did not change the number of pH3 + cells in  
275 either females or males, at 20 days of age. ( $n = 16$  intestines, two-way ANOVA, interaction  
276  $p > 0.05$ ; post-hoc test, NS  $p > 0.05$ , \*\*\* $p < 0.001$ ).

277 **e**, Adult-onset knock-down of *Atg5* in adult ECs shortened lifespan of males but not females  
278 (log-rank test, females  $p = 0.80$ , males  $p = 4.5E-03$ ,  $n \geq 195$  flies). See also Table S4 for Cox PH  
279 analysis.

280

281

---

282 **Cellular and molecular responses to TOR-attenuation depend on cell-autonomous**  
283 **sexual identity of enterocytes**

284 In *Drosophila*, somatic cells determine sexual identity in a cell-autonomous manner, based on  
285 sex chromosome karyotype, via the sex determination pathway<sup>47</sup>. Genetic manipulation of  
286 the pathway at the level of the splicing factor *transformer* allows for the generation of tissue-  
287 specific sexual chimeras<sup>16,48</sup>. To test the role of cell-autonomous sexual identity in regulating

288 sexually dimorphic phenotypes, we switched sex solely in enterocytes, of males and females,  
289 through the expression or abrogation of *transformer*<sup>Female</sup> (*tra*<sup>F</sup>).

290

291 Enterocyte size is regulated both by sex and TOR-signalling (Fig 2c). Masculinisation of  
292 female cells through enterocyte-specific expression of *tra*<sup>F[RNAi]</sup>, reduced cell size to that of  
293 males, and this was not reduced further by treatment with rapamycin (Fig S5b). In contrast,  
294 feminisation of male enterocytes by expression of *tra*<sup>F</sup> did not affect their size, and neither did  
295 treatment with rapamycin (Fig S5a). This suggests that expression of *tra*<sup>F</sup> is necessary, but not  
296 sufficient, for the larger cell size observed in female intestines.

297

298 Using Lysotracker-staining to assess the level of autophagy in the intestines of sexual  
299 chimeras, we observed that males expressing *tra*<sup>F</sup> in enterocytes (*mex1Gal4;UAS-tra*<sup>F</sup>) had  
300 suppressed basal autophagy levels in the intestine, and this showed a significant increase upon  
301 treatment with rapamycin (Fig 4a), similar to control females. In concordance, females  
302 expressing *tra*<sup>F[RNAi]</sup> in enterocytes (*mex1Gal4;UAS-tra*<sup>F[RNAi]</sup>) had increased autophagy  
303 compared to control females, but did not respond to treatment with rapamycin (Fig 4b),  
304 similar to control males. These data suggest that levels of autophagy in enterocytes are  
305 determined by enterocyte sex, not organismal sex.

306

307 Our recent study demonstrated that intestinal autophagy is mediated through a histones-Bchs  
308 axis, where levels of H3 and H4 histone proteins regulate the autophagy cargo adaptor  
309 *bluecheese* (*Bchs*) in enterocytes<sup>29</sup>. Publicly-available expression data (*FlyAtlas 2*) indicates  
310 that *Bchs* is expressed at higher levels in intestines of males than of females<sup>49</sup>. We confirmed  
311 that *Bchs* transcript levels, and expression of histones H3 and H4 proteins, were higher in  
312 intestines of males compared to females. Rapamycin treatment did not increase either *Bchs* or



313 histone expression further in males but did so in females, to levels comparable with those in  
 314 males in the case of *Bchs* (Fig S6a,b). Notably, the level of H3, H4 and *Bchs* was strictly  
 315 correlated with the level of autophagy in the intestines of sexual chimeras. Feminised males  
 316 showed a low level of H3, H4 and *Bchs* which was increased to the same level as that of  
 317 control males in response to rapamycin treatment (Fig 4c,d). Masculinised females had high  
 318 basal levels of H3, H4 and *Bchs*, which were not increased further in response to rapamycin  
 319 treatment (Fig 4e,f). These results suggest that the histone H3/H4-*Bchs* axis plays a key role  
 320 in the sexual dimorphism of intestinal autophagy.  
 321

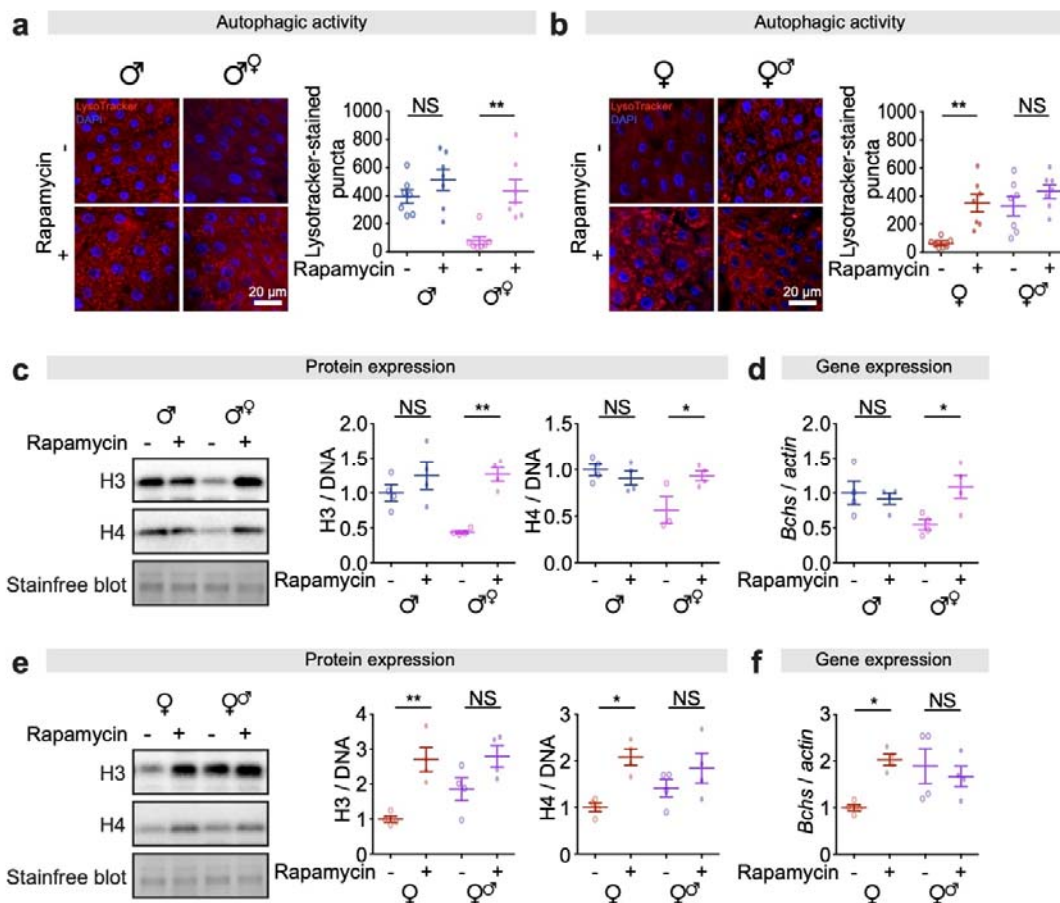

322

323 **Figure 4. Cell-autonomous sexual identity in enterocytes dictates the levels of autophagy,**

324 **histones and *Bchs* expressions in response to rapamycin treatment.**



325 **a**, Feminisation of male guts by expression of *tra<sup>F</sup>* in ECs reduced the number of Lysotracker-  
326 stained puncta in the gut, and it restored the response to rapamycin treatment. (n = 7 intestines  
327 per condition; n = 2-3 pictures per intestine, data points represent the average value per  
328 intestine; linear mixed model, interaction p<0.05; post-hoc test, NS p>0.05, \*\*p<0.01).

329 **b**, Masculinisation of female guts by knock-down of *tra<sup>F</sup>* in ECs increased the number  
330 of Lysotracker-stained puncta in the gut, and abolished the response to rapamycin  
331 treatment. (n = 7 intestines per condition; n = 2-3 pictures per intestine, data points represent  
332 the average value per intestine; linear mixed model, interaction p<0.05; post-hoc  
333 test, NS p>0.05, \*\*p<0.01).

334 **c**, Expression of histones H3 and H4 in the gut of feminised males was lower than in males,  
335 and rapamycin treatment increased it to the level in males (n = 3-4 biological replicates of 10  
336 intestines per replicate, two-way ANOVA, H3 and H4, interaction p<0.05; post-hoc test, NS  
337 p>0.05, \*p<0.05, \*\*p<0.01).

338 **d**, Expression of *Bchs* in the gut of feminised males was lower than in males, and rapamycin  
339 treatment increased it to the level in males (n = 4 biological replicates of 10 intestines per  
340 replicate, two-way ANOVA, H3 and H4, interaction p<0.05; post-hoc test, NS p>0.05,  
341 \*p<0.05).

342 **e**, Expression of histones H3 and H4 in the gut of masculinised females was higher than in  
343 females, and rapamycin treatment did not increase it further (n = 4 biological replicates of 10  
344 intestines per replicate, two-way ANOVA, interaction p>0.05; post-hoc test, NS p>0.05,  
345 \*p<0.05, \*\*p<0.01).

---

346

347

348 **Sexual identity of enterocytes influences fecundity and determines the response of**  
349 **intestinal homeostasis and lifespan to rapamycin**

350 Limited cell growth and increased autophagy are correlated with better intestinal homeostasis  
 351 during ageing in males compared to females (Fig 2c-e). To determine if this correlation held  
 352 in individuals with sex-switched enterocytes, we measured intestinal dysplasia, barrier  
 353 function, and ISC hypermitosis. In concordance with analyses of autophagy in young  
 354 individuals, intestinal dysplasia and barrier function were correlated with enterocyte sex, as  
 355 were responses of these pathologies to rapamycin (Fig 5a,b,d,e). ISC mitoses were affected by  
 356 enterocyte sex, such that males with feminised enterocytes had higher numbers of mitoses,  
 357 and females with masculinised enterocytes had fewer (Fig 5c,f). This is in line with other  
 358 evidence of non-cell autonomous effects of enterocyte homeostasis on ISCs<sup>50</sup>.  
 359

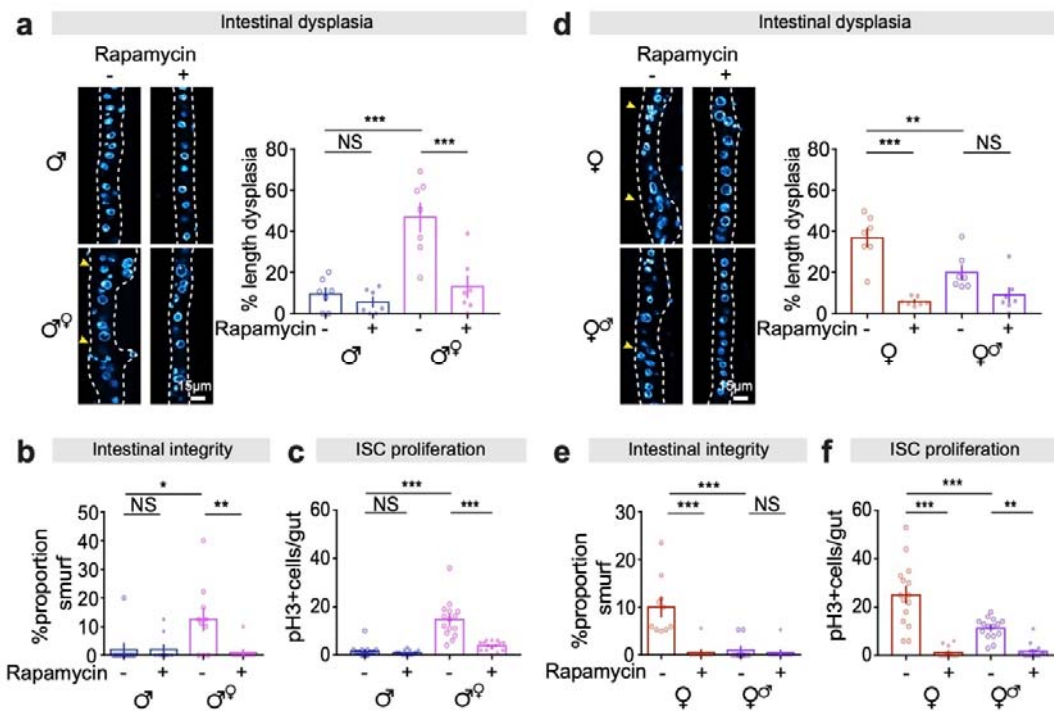

360

361 **Figure 5. Cell-autonomous sexual identity in enterocytes mediates age-related gut**  
 362 **pathology, barrier function and ISC mitoses in response to rapamycin treatment.**

363 **a**, Feminisation of male guts by expression of *tra<sup>F</sup>* in ECs increased intestinal dysplasia,  
364 which was attenuated by rapamycin treatment, at 50 days of age. (n = 7 intestines per  
365 condition; two-way ANOVA, interaction p<0.01; post-hoc test, NS p>0.05, \*\*\*p<0.001).

366 **b**, Feminisation of male guts by expression of *tra<sup>F</sup>* in ECs increased the proportion of Smurfs,  
367 which was attenuated by rapamycin treatment, at 60 days of age. Bar charts show with n  
368 = 10 biological replicates of 6-12 flies per replicate (two-way ANOVA, interaction p<0.05;  
369 post-hoc test, NS p>0.05, \*p<0.05, \*\*p<0.01).

370 **c**, Feminisation of male guts by expression of *tra<sup>F</sup>* in ECs increased the number of pH3 + cells,  
371 which was attenuated by rapamycin treatment, at 20 days of age. (n = 15 intestines per  
372 condition; two-way ANOVA, interaction p<0.001; post-hoc test, NS p>0.05, \*\*\*p<0.001).

373 **d**, Masculinisation of female guts by knock-down of *tra<sup>F</sup>* in ECs decreased intestinal  
374 dysplasia, which was not further decreased by the combination of rapamycin treatment, at 50  
375 days of age. (n = 7 intestines per condition; two-way ANOVA, interaction p<0.01; post-hoc  
376 test, NS>0.05, \*\*p<0.01, \*\*\*p<0.001).

377 **g**, Masculinisation of female guts by knock-down of *tra<sup>F</sup>* in ECs decreased the proportion of  
378 Smurfs, which was not further decreased by the combination of rapamycin treatment, at 60  
379 days of age. Bar charts show with n = 10 biological replicates of 15-20 flies per replicate  
380 (two-way ANOVA, interaction p<0.001; post-hoc test, NS p>0.05, \*\*\*p<0.001).

381 **h**, Masculinisation of female guts by knock-down of *tra<sup>F</sup>* in ECs decreased the number of  
382 pH3+ cells, which was further decreased by the combination of rapamycin treatment, at 20  
383 days of age. (n = 15 intestines per condition; two-way ANOVA, interaction p<0.001; post-hoc  
384 test, \*\*p<0.01, \*\*\*p<0.001).

385

386

387 Gut growth via ISC division <sup>48,51</sup>, and some aspects of intestinal metabolism <sup>52</sup>, have been  
388 demonstrated to impact fertility in females and males, respectively. To determine whether

389 enterocyte sex can influence reproductive output, we measured fertility in individuals with  
390 sex-switched enterocytes. We did not detect a difference in the fertility of enterocyte-  
391 feminised males compared to that of control males (Fig 6a,b). However, enterocyte-  
392 masculinised females showed moderately, but significantly, decreased fertility, compared to  
393 that of control females (Fig 6a,c).

394

395 Feminised males showed a lifespan extension upon treatment with rapamycin that was not  
396 observed in control males (Fig 6d). In contrast, masculinized females did not extend lifespan  
397 in response to rapamycin (Fig 6e). Interestingly, while the lifespan of gut-feminised males  
398 was not shorter on control food compared to that of control males (Fig 6d), the lifespan of  
399 gut-masculinized females on both rapamycin-treated and control food was comparable to that  
400 of control females treated with rapamycin (Fig 6e), suggesting an interaction between  
401 enterocyte size, enterocyte autophagy, intestinal pathology, fertility, and pharmacological  
402 mTOR-attenuation by rapamycin, which consequently mediates lifespan.

403

404 Altogether, these results suggest that the intrinsic sexual identity of enterocytes determines  
405 the effect of rapamycin on intestinal homeostasis and lifespan, where individuals with male  
406 enterocytes do not reduce intestinal pathology or extend lifespan under rapamycin treatment  
407 while flies with female enterocytes do so, regardless of organismal sex.

408

409

410

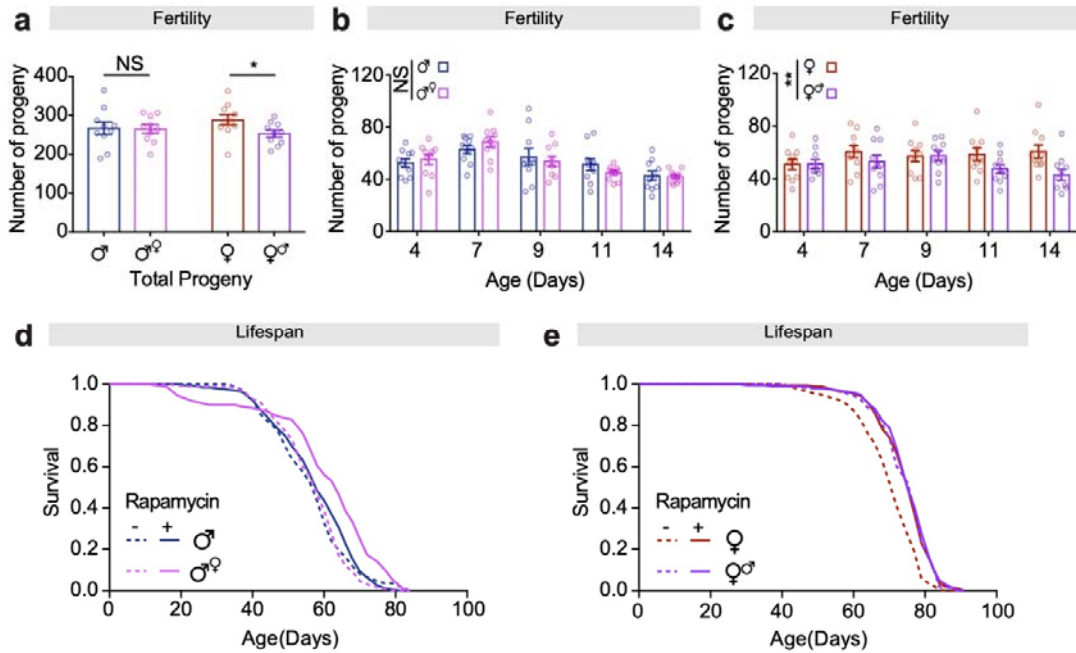

411

412 **Figure 6. Cell-autonomous sexual identity in enterocytes influences fertility, and it**

413 **mediates extension of lifespan in response to rapamycin treatment.**

414 **a-c**, Feminisation of male guts by expression of *tra<sup>F</sup>* in ECs did not affect the number of

415 progeny, while masculinisation of female guts by knock-down of *tra<sup>F</sup>* in ECs reduced the

416 number of progeny (n = 10 biological replicates of 3 males and 3 females per replicate, (a)

417 students t test, NS p>0.05, \*p<0.05; (b) two-way ANOVA, treatment p>0.05; (c) two-way

418 ANOVA, treatment p<0.01).

419 **d**, Feminisation of male guts by expression of *tra<sup>F</sup>* in ECs extended lifespan in response to

420 rapamycin treatment (log-rank test, p= 1.55E-06, *mexG4*> *tra<sup>F</sup>* Control vs *mexG4*>

421 *tra<sup>F</sup>* Rapamycin, n >190 flies). See also Table S5 for Cox PH analysis.

422 **e**, Masculinisation of female guts by knock-down of *tra<sup>F</sup>* in ECs extended lifespan, which was

423 not further extend by rapamycin treatment (log-rank test, p= 1.56E-09 *mexG4*> Control

424 vs *mexG4*> *tra<sup>F</sup>[RNAi]* Control, n >190 flies). See also Table S6 for Cox PH analysis.

425

426

427 **Discussion**

428 The IIS/mTOR signalling network regulates dimorphic, complex traits such as metabolism,  
429 growth, and lifespan<sup>22,53-55</sup>. However, it is not well understood how dimorphisms in  
430 IIS/mTOR-regulated traits impact tissue ageing and responses to geroprotective drugs.  
431 Targeted mTORC1 inhibition by the drug rapamycin extends lifespan more in female than in  
432 male mice<sup>24,56</sup>. Although there is evidence that off-target effects of rapamycin on hepatic  
433 mTORC2 signalling via *Rictor* can reduce the lifespan of male mice<sup>57</sup>, dimorphic effects of  
434 rapamycin treatment on lifespan may also be regulated by other, complex interactions with  
435 specific tissues and through interaction with environmental factors such as the microbiome<sup>26</sup>.  
436 Responses of lifespan to rapamycin treatment trials in mice were dose-dependent, and we do  
437 not yet know the maximum lifespan extension that can be achieved, in either sex, through  
438 chronic treatment with the drug. In one study, female mice were found to have higher  
439 circulating levels of rapamycin than did males for a given dose in the food<sup>24</sup>, suggesting that  
440 sex differences in drug metabolism or bioavailability could play a role in dimorphic responses  
441 to pharmaceutical therapies<sup>12</sup>. *Drosophila*, which shows a strong lifespan extension in  
442 females treated with rapamycin<sup>27</sup>, offers a tractable system for understanding tissue-specific  
443 contributions to ageing dimorphisms<sup>16</sup>, and dimorphic responses to anti-ageing therapeutics  
444<sup>19,58</sup>.

445

446 Here, we show that treatment of *Drosophila* with rapamycin extends lifespan in females but  
447 not in males, regardless their genetic background. Rapamycin treatment increases autophagy  
448 and reduces cell size of intestinal enterocytes in females. We demonstrate a striking  
449 dimorphism in basal metabolism of enterocytes: in males, autophagy is constitutively high,  
450 cell size is smaller than in females, and both autophagy and cell size are insensitive to  
451 mTORC1-attenuation by rapamycin. This raises the possibility that intestinal autophagy is

452 actively buffered in males, or is maintained at an upper limit by constraints on the availability  
453 of autophagy components in enterocytes. One consequence of increased intestinal autophagy  
454 in males is attenuated age-related intestinal barrier function decline, underpinning the overall  
455 slower progression of age-related intestinal pathologies in males compared to females.  
456 Intestinal barrier function maintenance, independent of ISC division, is a key determinant of  
457 lifespan in *Drosophila*. This has been demonstrated in multiple ways in females through  
458 manipulation of diet <sup>59</sup>, the microbiome <sup>38</sup>, and through genetic targeting of junctional  
459 components <sup>60</sup> or upstream signalling pathways <sup>29,61</sup>. Males do not usually respond strongly to  
460 manipulations that attenuate functional decline of the intestine <sup>16,58</sup>, including rapamycin (<sup>27</sup>  
461 and this study), likely because progression of intestinal pathology is slow. Here, we show that  
462 males are also sensitive to barrier function decline, by genetically targeting autophagy  
463 components, which increased the incidence of barrier function failure, and decreased lifespan  
464 in males.

465

466 Our recent study demonstrated that a specific autophagy pathway, regulated by histones  
467 H3/H4 and requiring the cargo adaptor Bchs/WDFY3, maintains junctional integrity in  
468 enterocytes in the intestine in females during ageing <sup>29</sup>. Autophagy in enterocytes also lowers  
469 sensitivity to ROS induced by commensal bacteria, via suppression of p62 and Hippo  
470 pathway genes, to maintain septate junction integrity and attenuate dysplasia <sup>62</sup>. Maintenance  
471 of cell junctions by increased autophagy is not restricted to epithelial tissue; for example, this  
472 occurs acutely in mammalian endothelial cells to prevent excessive diapedesis of neutrophils  
473 in inflammatory responses <sup>63</sup>. Here, we demonstrate a link between enterocyte sex, the  
474 histone-Bchs axis, junctional integrity, and lifespan. We show that cell-autonomous sexual  
475 identity of enterocytes determines their histone and *Bchs* levels, and subsequently their basal  
476 level of autophagy. Autophagy is key to maintaining junctional integrity in enterocytes and,

477 consequently, barrier function of the intestine. Thus, the sex-determined metabolic state of  
478 enterocytes, including basal autophagy and cell size, dictates how they respond to rapamycin  
479 treatment; at the cellular level, at the level of organ physiology, and at the level of whole  
480 organism homeostasis during ageing to influence lifespan<sup>55,64</sup>.

481

482 Why do males and females take such different approaches to intestinal homeostasis? Females  
483 pay a cost during ageing for maintaining their intestine in an anabolic state, with lower  
484 autophagy, higher cell growth, and higher rates of stem cell division (this study,<sup>16,48</sup>) leading  
485 to pathology and dysplasia at older ages<sup>16</sup>. Selection acts weakly on age-related traits and  
486 strongly on those promoting fitness in youth<sup>65</sup>, and females require hormone-regulated  
487 intestinal cell growth and organ size plasticity to maintain egg production at younger ages  
488<sup>51,66</sup>. Here, we show that metabolic responses of the intestine to mTOR-attenuation, including  
489 autophagy and cell growth, are regulated by *tra* cell-autonomously. Sensitivity to nutrients,  
490 particularly protein levels, in the diet is important for females to maintain and regulate egg  
491 production<sup>67</sup>; we show that female enterocytes have a cell-autonomous sensitivity to changes  
492 in mTOR-signalling. This may be an adaptive mechanism to maintain reproductive output in  
493 the face of fluctuating nutrient availability<sup>68</sup>, where females can take advantage of higher  
494 protein by resizing enterocytes<sup>69</sup>, in addition to post-mating organ growth achieved through  
495 stem cell division<sup>48,51</sup>. We show that females with masculinised enterocytes, which have a  
496 smaller cell size and higher autophagy, have reduced fertility. This is similar to the reduction  
497 in fertility demonstrated when ISCs are masculinised in female guts<sup>48</sup>, suggesting that sex-  
498 determination signalling regulates organ size plasticity via both cell growth and cell division.  
499 Although fertility was reduced, enterocyte-masculinised females had healthier guts over  
500 ageing and a longer lifespan, supporting the idea that in females, early life reproduction  
501 trades-off with intestinal homeostasis at older ages<sup>66</sup>.



502

503 Interestingly, males with feminised enterocytes did not show an increase in enterocyte cell  
504 size, suggesting that *tra<sup>F</sup>* is necessary, but not sufficient, to induce enterocyte growth,  
505 contrary to the effect seen on whole body size when *tra<sup>F</sup>* is expressed throughout the  
506 developing larva <sup>70</sup>. Females produce larger enterocytes when flies are fed with a high protein  
507 diet, or through genetically activating mTOR or blocking autophagy by manipulation of  
508 mTOR-autophagy cascade core components in a cell-autonomous manner <sup>69</sup>. However, we  
509 find that manipulating enterocyte sex, and consequently autophagy levels, does not lead to  
510 larger cells in males. Together, these data suggest that feminising enterocytes by  
511 overexpression of *tra<sup>F</sup>* in male guts does not simply recapitulate autophagy reduction by  
512 enterocyte-specific knock-down of *Atg5*. One possibility is that feminised enterocytes  
513 maintain better nutrient absorption during ageing, a known determining factor of lifespan <sup>71,72</sup>,  
514 counteracting the effect of increased pathology and leading to comparable lifespan to males  
515 on control food.

516

517 Male fertility was unaffected by feminisation of enterocytes. Male fitness may rely more  
518 heavily on nutrients other than protein, particularly carbohydrates, where non-autonomous  
519 regulation of sugar metabolism in the male gut by the testis has been shown to be essential for  
520 sperm production <sup>52</sup>. The sexes, therefore, rely on distinct metabolic programmes to maintain  
521 fitness. Cellular growth and size plasticity of the gut may not increase fitness in males, and as  
522 a result, they may maintain their intestines at a low catabolic limit that cannot be pushed  
523 further by lowered mTOR. Sexually antagonistic traits can be resolved by sex-specific  
524 regulation <sup>73</sup>. Direct regulation of cell growth and autophagy (this study) and stem cell  
525 activity <sup>48</sup> by sex determination genes may allow males and females to diverge in their

526 energetic investment in the gut, and this may interact with fertility and pathophysiology,  
527 which can eventually determine lifespan.

528

529 Importantly, the higher basal levels of autophagy in males appears to be conserved in rodents,  
530 since male mice have higher basal levels of autophagy than do females. This is seen in  
531 multiple tissues, including transcription of autophagy-related genes in spinal cord and muscle  
532 tissue <sup>74</sup>, and autophagy proteins in the heart and liver <sup>75</sup>, of male mice. These sex differences  
533 are present from early development and into adulthood, and are speculated to contribute to the  
534 greater female vulnerability to age-related disorders such as Alzheimer's disease <sup>76</sup>. Sex  
535 differences in baseline metabolism may profoundly influence responses to a broad range of  
536 treatments to such age-related disorders, particularly those that target nutrient-sensing  
537 pathways.

538

539 Understanding sex differential responses to geroprotective interventions gives an  
540 understanding of the mechanistic underpinnings of sex differences in the intrinsic rate of  
541 ageing in specific tissues <sup>14,77</sup>, including sex-specific trade-offs. When we treat age-related  
542 disease, we are not treating individuals with equal case histories, but individuals impacted by  
543 a lifetime of differences, including those regulated by sex. Sex will be a fundamental  
544 distinction made in precision medicine, and understanding conserved mechanisms regulating  
545 dimorphism and determining responses to therapeutics will allow for the development of sex-  
546 optimised treatments.

547

## 548 **Acknowledgements**

549 We thank Paula Juricic Dzankic and Jenny Fröhlich for help in preparing tissues and  
550 experiments. We thank Paulina Mika, Mary-Kate Corbally and Rebecca Belmonte for their

551 help in maintaining lifespan experiments. We thank Oliver Hahn for his help with  
552 microbiome data analysis and the Max Planck Genome Center Cologne for performing next-  
553 generation sequencing. We thank the FACS and Imaging Core Facility at the Max Planck  
554 Institute for Biology of Ageing for their help with microscopy data. We thank Adam Dobson  
555 and David Duneau for critical reading of the manuscript and colleagues at University of  
556 Edinburgh, UCL IHA, and MPI-Age for their feedback on the study. The Bloomington  
557 Drosophila Stock Center (NIH P40OD018537) and Vienna Drosophila Resource Center  
558 (VDRC) are acknowledged for fly lines. This project has received funding from the European  
559 Research Council (ERC) under the European Union's Horizon 2020 research and innovation  
560 programme no. 741989 and the Max-Planck-Gesellschaft. Jennifer C Regan was supported by  
561 a Wellcome Trust Seed Award (210183/Z/18/Z), and start-up funding from The University of  
562 Edinburgh. Yu-Xuan Lu was supported by an EMBO Long-Term Fellowship (ALTF 419-  
563 2014).

564

### 565 **Author Contributions**

566 J.C.R., Y.X.L. and L.P. conceived the study and designed the experiments, J.C.R., Y.X.L.,  
567 E.U., R.M., J.H.C. and D.K. conducted the experiments, J.C.R., Y.X.L., E.U. and R.M.  
568 analysed the data, J.C.R. and Y.X.L. wrote the original draft of paper, J.C.R., Y.X.L. and L.P.  
569 reviewed and edited the paper. Both J.C.R and Y.X.L, contributed equally and have the right  
570 to list their name first in their CV. All authors contributed to the article and approved the  
571 submitted version.

572

### 573 **Competing Interests**

574 The authors declare no competing interests.

575

## 576 **Method Details**

### 577 **Fly stocks and husbandry**

578 All transgenic lines were backcrossed for at least six generations into the outbred line, *w<sup>Dah</sup>*  
579 maintained in population cages (unless specified otherwise in figure legends). Stocks were  
580 maintained and experiments conducted at 25°C on a 12 hr:12 hr light/dark cycle at 60%  
581 humidity, on food containing 10 % (w/v) brewer's yeast, 5% (w/v) sucrose, and 1.5% (w/v)  
582 agar unless otherwise noted. The following stocks were used in this study: *UAS-Atg5<sup>[RNAi]</sup>*  
583 <sup>78,79</sup>, *UAS-tra<sup>F</sup>* (Bloomington #4590), *UAS-tra<sup>F[RNAi]</sup>* (Bloomington #44109), *mex1Gal4*  
584 (Bloomington #91369), *5966GS*<sup>80</sup>, *Dah*<sup>81</sup>, *DGRP-OX*<sup>32</sup>.

585

### 586 **Lifespan assay**

587 Flies were reared at standard density before being used for lifespan experiments. Crosses were  
588 set up in cages with grape juice agar plate. The embryos were collected in PBS and squirted  
589 into bottles at 20 µl per bottle to achieve standard density. The flies were collected over a 24 h  
590 period and allowed 48 h to mate after eclosing as adults. Flies were subsequently lightly  
591 anaesthetized with CO<sub>2</sub>, the adults were sorted into the vials at a density of 20/vial.  
592 Rapamycin (LC laboratories) and/or RU486 (Sigma) dissolved in ethanol was added to food.  
593 For control food ethanol alone was added.

594

### 595 **Fertility assay**

596 All fertility assays were performed on vials housing 3 virgin females and 3 virgin males that  
597 were all 2 days old. All assays were performed on 10 replicates per group. Flies were  
598 transferred to new vials every 2–3 days and flies were discarded after the fifth 'flip'. In order  
599 to assess overall fertility, we counted emergence of pupal progeny, as previously described<sup>82</sup>.

600

601 **Gut barrier assay (“Smurf” assay)**

602 Flies were aged on normal SYA food and then switched to SYA food containing 2.5% (w/v)  
603 Brilliant Blue FCF (Sigma). Flies were examined after 48 h, as previously described<sup>16,34</sup>.

604

605 **Immunoblotting**

606 Fly tissues were homogenized in 80µl 1x RIPA Lysis and Extraction Buffer (Thermofisher)  
607 containing PhosSTOP (Roche) and cOmplete, Mini, EDTA-free Protease Inhibitor Cocktail  
608 (Roche). Extracts were then cleared by centrifugation, protein content determined by using  
609 Pierce™ BCA Protein Assay (Thermofisher) and DNA content determined by using Qubit  
610 dsDNA HS Assay (Invitrogen). Approximately 8µg of protein extract was loaded per lane on  
611 polyacrylamide gel (4-20% Criterion, BioRad). Proteins were separated and transferred to  
612 PVDF membrane. Following antibodies were used: Atg8a (Péter Nagy’s lab, 1:5000),  
613 Phospho-Drosophila p70 S6 Kinase (Thr398) (Cell Signaling #9209, 1:1000), total S6K (self-  
614 made, 1:1000), Histone H3 (Abcam #ab1791, 1:10000) and Histone H4 (Active motif  
615 #39269, 1:3000). HRP-conjugated secondary antibodies (Invitrogen) were used. Blots were  
616 developed using the ECL detection system (Amersham). Immunoblots were analysed using  
617 Image Lab program (Bio-Rad laboratories).

618

619 **RNA isolation and quantitative RT-PCR**

620 Tissue was dissected, frozen on dry ice and stored at -80°C. Total RNA from guts of 10 flies  
621 was extracted using TRIzol (Invitrogen) according to the manufacturer’s instructions. mRNA  
622 was reverse transcribed using random hexamers and the SuperScript III First Strand system  
623 (Invitrogen). Quantitative PCR was performed using Power SYBR Green PCR (Applied  
624 Biosystems) on a QuantStudio 6 instrument (Applied Biosystems) by following the  
625 manufacturer’s instructions.

626

627 **Lysotracker and Cyto-ID staining, imaging and image analysis**

628 Lysotracker dye accumulates in low pH vacuoles, including lysosomes and autolysomes, and  
629 Cyto-ID staining selectively labels autophagic vacuoles. Combination of both gives a better  
630 assessment of entire autophagic process<sup>29,42</sup>. For the dual staining, complete guts were  
631 dissected in PBS, and stained with Cyto-ID (Enzo Life Sciences, 1:1000) for 30 min, then  
632 stained with Lysotracker Red DND-99 (Thermofisher, 1:2000) with Hoechst 33342 (1mg/ml,  
633 1:1000) for 3 min. For the experiment only with Lysotracker staining, guts were stained with  
634 Lysotracker Red and Hoechst 33342 directly after dissection. Guts were mounted in  
635 Vectashield (Vector Laboratories, H-1000) immediately. Imaging was performed immediately  
636 using a Leica TCS SP8 confocal microscope with a 20x objective plus 5x digital zoom in.  
637 Three separate images were obtained from each gut. Settings were kept constant between the  
638 images. Images were analysed by Imaris 9 (Bitplane).

639

640 **Immunohistochemistry and imaging of the *Drosophila* intestine**

641 The following antibodies were used for immunohistochemistry of fly guts; primary antibody:  
642 Phospho-Histone H3 (Ser10) (Cell Signalling #9701, 1:200). Secondary antibody: Alexa  
643 Flour 594 goat anti-rabbit (A11012, 1:1000). Guts were dissected in PBS and immediately  
644 fixed in 4% formaldehyde for 30 min, and subsequently washed in 0.1% Triton-X / PBS  
645 (PBST), blocked in 5% BSA / PBST, incubated in primary antibody overnight at 4 °C and in  
646 secondary antibody for 1 h at RT. Guts were mounted in Vectashield, scored and imaged as  
647 described above. For dysplasia measurement, the percentage intestinal length was blind-  
648 scored from luminal sections of the R2 region of intestines. For gut cell size measurement,  
649 nearest-neighbour internuclear distance in the R2 region was measured from raw image flies  
650 using the measure function in Fiji (Image J); 20 distances per gut, n ≥ 6 guts per condition.

651

652 **Library preparation and 16S sequencing / data analysis**

653 Flies were washed in ethanol, then midguts were dissected in single PBS droplets, and 20 guts  
654 pooled per replicate. DNA extraction was performed using the DNeasy Blood&Tissue Kit  
655 (Qiagen) following the manufacturer's instructions for gram-positive bacterial DNA, and  
656 using 0.1mm glass beads and a bead beater for 45s at 30Hz. Library preparation was  
657 performed following Illumina's 16S Metagenomic Sequencing Library Preparation guide,  
658 with the following alterations: 100ng initial DNA amount, reactions for V1-V2 primer pair,  
659 amplicon clean-up with GeneRead Size Selection Kit following the DNA library protocol,  
660 and BstZ17I digest + gel extraction between PCR reactions for V1-V2 amplicons (for  
661 *Wolbachia* sequence removal). Pooled libraries were sequenced to 100,000 reads/sample on a  
662 HiSeq 250bp. Analysis was performed after quality control and paired-end joining for V1-V2  
663 using the Qiime 1 pipeline and the greengenes database, at a depth of 20,000 reads/sample.  
664 Remaining *Wolbachia* sequences were removed bioinformatically before further analysis. For  
665 total quantification, qPCR with V3-V4 primers was performed with extension time of 1min.  
666 For validation, *Acetobacter pomorum* absolute amount was quantified by qPCR using  
667 bacteria-specific primers.

668

669 **Quantification and statistical analysis**

670 Statistical analyses were performed in Prism (Graphpad) or R (version 3.5.5) except for Log-  
671 rank test using Excel (Microsoft). Sample sizes and statistical tests used are indicated in the  
672 figure legends, and Tukey post-hoc test was applied to multiple comparisons correction. Error  
673 bars are shown as standard error of the mean (SEM). For box-and-whiskers plots, Median,  
674 25th and 75th percentiles, and Tukey whiskers are indicated. The criteria for significance are:  
675 NS (not significant)  $p > 0.05$ ; \*  $p < 0.05$ ; \*\*  $p < 0.01$  and \*\*\*  $p < 0.001$ .

676

## 677 **References**

678

- 679 1 Xirocostas, Z. A., Everingham, S. E. & Moles, A. T. The sex with the reduced sex  
680 chromosome dies earlier: a comparison across the tree of life. *Biol Lett* **16**, 20190867,  
681 doi:10.1098/rsbl.2019.0867 (2020).
- 682 2 Lemaitre, J. F. *et al.* Sex differences in adult lifespan and aging rates of mortality  
683 across wild mammals. *Proceedings of the National Academy of Sciences of the United*  
684 *States of America* **117**, 8546-8553, doi:10.1073/pnas.1911999117 (2020).
- 685 3 Austad, S. N. Why women live longer than men: sex differences in longevity. *Gen*  
686 *Med* **3**, 79-92, doi:10.1016/s1550-8579(06)80198-1 (2006).
- 687 4 Mauvais-Jarvis, F., Arnold, A. P. & Reue, K. A Guide for the Design of Pre-clinical  
688 Studies on Sex Differences in Metabolism. *Cell metabolism* **25**, 1216-1230,  
689 doi:10.1016/j.cmet.2017.04.033 (2017).
- 690 5 Bale, T. L. & Epperson, C. N. Sex differences and stress across the lifespan. *Nature*  
691 *neuroscience* **18**, 1413-1420, doi:10.1038/nn.4112 (2015).
- 692 6 Klein, S. L. & Flanagan, K. L. Sex differences in immune responses. *Nature reviews.*  
693 *Immunology* **16**, 626-638, doi:10.1038/nri.2016.90 (2016).
- 694 7 Gubbels Bupp, M. R. Sex, the aging immune system, and chronic disease. *Cell*  
695 *Immunol* **294**, 102-110, doi:10.1016/j.cellimm.2015.02.002 (2015).
- 696 8 Tidiere, M. *et al.* Pathogens Shape Sex Differences in Mammalian Aging. *Trends*  
697 *Parasitol* **36**, 668-676, doi:10.1016/j.pt.2020.05.004 (2020).
- 698 9 Gubbels Bupp, M. R., Potluri, T., Fink, A. L. & Klein, S. L. The Confluence of Sex  
699 Hormones and Aging on Immunity. *Front Immunol* **9**, 1269,  
700 doi:10.3389/fimmu.2018.01269 (2018).
- 701 10 Mauvais-Jarvis, F. *et al.* Sex and gender: modifiers of health, disease, and medicine.  
702 *Lancet* **396**, 565-582, doi:10.1016/S0140-6736(20)31561-0 (2020).
- 703 11 Gerdtts, E. & Regitz-Zagrosek, V. Sex differences in cardiometabolic disorders. *Nature*  
704 *medicine* **25**, 1657-1666, doi:10.1038/s41591-019-0643-8 (2019).
- 705 12 Garratt, M. Why do sexes differ in lifespan extension? Sex-specific pathways of aging  
706 and underlying mechanisms for dimorphic responses. *Nutrition and Healthy Aging* **5**,  
707 247-259, doi:10.3233/NHA-190067 (2020).
- 708 13 Regan, J. C. & Partridge, L. Gender and longevity: why do men die earlier than  
709 women? Comparative and experimental evidence. *Best practice & research. Clinical*  
710 *endocrinology & metabolism* **27**, 467-479, doi:10.1016/j.beem.2013.05.016 (2013).
- 711 14 Austad, S. N. & Fischer, K. E. Sex Differences in Lifespan. *Cell metabolism* **23**, 1022-  
712 1033, doi:10.1016/j.cmet.2016.05.019 (2016).
- 713 15 Richardson, N. E. *et al.* Lifelong restriction of dietary branched-chain amino acids has  
714 sex-specific benefits for frailty and life span in mice. *Nature Aging* **1**, 73-86,  
715 doi:10.1038/s43587-020-00006-2 (2021).
- 716 16 Regan, J. C. *et al.* Sex difference in pathology of the ageing gut mediates the greater  
717 response of female lifespan to dietary restriction. *eLife* **5**, doi:10.7554/eLife.10956  
718 (2016).
- 719 17 Bjedov, I. & Rallis, C. The Target of Rapamycin Signalling Pathway in Ageing and  
720 Lifespan Regulation. *Genes (Basel)* **11**, doi:10.3390/genes11091043 (2020).



- 721 18 Castillo-Quan, J. I. *et al.* A triple drug combination targeting components of the  
722 nutrient-sensing network maximizes longevity. *Proceedings of the National Academy*  
723 *of Sciences of the United States of America* **116**, 20817-20819,  
724 doi:10.1073/pnas.1913212116 (2019).
- 725 19 Partridge, L., Fuentealba, M. & Kennedy, B. K. The quest to slow ageing through drug  
726 discovery. *Nature reviews. Drug discovery*, doi:10.1038/s41573-020-0067-7 (2020).
- 727 20 Lamming, D. W., Ye, L., Sabatini, D. M. & Baur, J. A. Rapalogs and mTOR inhibitors as  
728 anti-ageing therapeutics. *J Clin Invest* **123**, 980-989, doi:10.1172/JCI64099 (2013).
- 729 21 Saxton, R. A. & Sabatini, D. M. mTOR Signaling in Growth, Metabolism, and Disease.  
730 *Cell* **168**, 960-976, doi:10.1016/j.cell.2017.02.004 (2017).
- 731 22 Selman, C. *et al.* Ribosomal protein S6 kinase 1 signaling regulates mammalian life  
732 span. *Science* **326**, 140-144, doi:10.1126/science.1177221 (2009).
- 733 23 Weichhart, T. mTOR as Regulator of Lifespan, Aging, and Cellular Senescence: A Mini-  
734 Review. *Gerontology* **64**, 127-134, doi:10.1159/000484629 (2018).
- 735 24 Miller, R. A. *et al.* Rapamycin-mediated lifespan increase in mice is dose and sex  
736 dependent and metabolically distinct from dietary restriction. *Aging cell* **13**, 468-477,  
737 doi:10.1111/accel.12194 (2014).
- 738 25 Harrison, D. E. *et al.* Rapamycin fed late in life extends lifespan in genetically  
739 heterogeneous mice. *Nature* **460**, 392-395, doi:10.1038/nature08221 (2009).
- 740 26 Bitto, A. *et al.* Transient rapamycin treatment can increase lifespan and healthspan in  
741 middle-aged mice. *eLife* **5**, doi:10.7554/eLife.16351 (2016  
742 ).
- 743 27 Bjedov, I. *et al.* Mechanisms of life span extension by rapamycin in the fruit fly  
744 *Drosophila melanogaster*. *Cell metabolism* **11**, 35-46,  
745 doi:10.1016/j.cmet.2009.11.010 (2010).
- 746 28 Fan, X. *et al.* Rapamycin preserves gut homeostasis during *Drosophila* aging.  
747 *Oncotarget* (2015).
- 748 29 Lu, Y. X. *et al.* A TORC1-histone axis regulates chromatin organisation and non-  
749 canonical induction of autophagy to ameliorate ageing. *eLife* **10**,  
750 doi:10.7554/eLife.62233 (2021).
- 751 30 Deshpande, S. A. *et al.* Quantifying *Drosophila* food intake: comparative analysis of  
752 current methodology. *Nature methods* **11**, 535-540, doi:10.1038/nmeth.2899 (2014).
- 753 31 Wong, R., Piper, M. D., Wertheim, B. & Partridge, L. Quantification of food intake in  
754 *Drosophila*. *PLoS One* **4**, e6063, doi:10.1371/journal.pone.0006063 (2009).
- 755 32 Savola, E. *et al.* Testing evolutionary explanations for the lifespan benefit of dietary  
756 restriction in fruit flies (*Drosophila melanogaster*). *Evolution* **75**, 450-463,  
757 doi:10.1111/evo.14146 (2021).
- 758 33 Juricic, P., Gronke, S. & Partridge, L. Branched-chain amino acids have equivalent  
759 effects to other essential amino acids on lifespan and ageing-related traits in  
760 *Drosophila*. *The journals of gerontology. Series A, Biological sciences and medical*  
761 *sciences*, doi:10.1093/gerona/glz080 (2019).
- 762 34 Rera, M., Clark, R. I. & Walker, D. W. Intestinal barrier dysfunction links metabolic  
763 and inflammatory markers of aging to death in *Drosophila*. *Proceedings of the*  
764 *National Academy of Sciences of the United States of America* **109**, 21528-21533,  
765 doi:10.1073/pnas.1215849110 (2012).
- 766 35 Martins, R. R., McCracken, A. W., Simons, M. J. P., Henriques, C. M. & Rera, M. How  
767 to Catch a Smurf? - Ageing and Beyond... In vivo Assessment of Intestinal

- 768 Permeability in Multiple Model Organisms. *Bio Protoc* **8**,  
769 doi:10.21769/BioProtoc.2722 (2018).
- 770 36 Regan, J. C. *et al.* Sex difference in pathology of the ageing gut mediates the greater  
771 response of female lifespan to dietary restriction. *Elife* **5**, e10956,  
772 doi:10.7554/eLife.10956 (2016).
- 773 37 Sasaki, A., Nishimura, T., Takano, T., Naito, S. & Yoo, S. K. white regulates  
774 proliferative homeostasis of intestinal stem cells during ageing in *Drosophila*. *Nat*  
775 *Metab* **3**, 546-557, doi:10.1038/s42255-021-00375-x (2021).
- 776 38 Clark, R. I. *et al.* Distinct Shifts in Microbiota Composition during *Drosophila* Aging  
777 Impair Intestinal Function and Drive Mortality. *Cell Rep* **12**, 1656-1667,  
778 doi:10.1016/j.celrep.2015.08.004 (2015).
- 779 39 Schinaman, J. M., Rana, A., Ja, W. W., Clark, R. I. & Walker, D. W. Rapamycin  
780 modulates tissue aging and lifespan independently of the gut microbiota in  
781 *Drosophila*. *Scientific reports* **9**, 7824, doi:10.1038/s41598-019-44106-5 (2019).
- 782 40 Jung, C. H., Ro, S. H., Cao, J., Otto, N. M. & Kim, D. H. mTOR regulation of autophagy.  
783 *FEBS letters* **584**, 1287-1295, doi:10.1016/j.febslet.2010.01.017 (2010).
- 784 41 Fingar, D. C., Salama, S., Tsou, C., Harlow, E. & Blenis, J. Mammalian cell size is  
785 controlled by mTOR and its downstream targets S6K1 and 4EBP1/eIF4E. *Genes &*  
786 *development* **16**, 1472-1487, doi:10.1101/gad.995802 (2002).
- 787 42 Oeste, C. L., Seco, E., Patton, W. F., Boya, P. & Perez-Sala, D. Interactions between  
788 autophagic and endo-lysosomal markers in endothelial cells. *Histochem Cell Biol* **139**,  
789 659-670, doi:10.1007/s00418-012-1057-6 (2013).
- 790 43 Guo, S. *et al.* A rapid and high content assay that measures cyto-ID-stained  
791 autophagic compartments and estimates autophagy flux with potential clinical  
792 applications. *Autophagy* **11**, 560-572, doi:10.1080/15548627.2015.1017181 (2015).
- 793 44 McGuire, S. E., Mao, Z. & Davis, R. L. Spatiotemporal gene expression targeting with  
794 the TARGET and gene-switch systems in *Drosophila*. *Sci STKE* **2004**, pl6,  
795 doi:10.1126/stke.2202004pl6 (2004).
- 796 45 Hansen, M., Rubinsztein, D. C. & Walker, D. W. Autophagy as a promoter of  
797 longevity: insights from model organisms. *Nature reviews. Molecular cell biology* **19**,  
798 579-593, doi:10.1038/s41580-018-0033-y (2018).
- 799 46 Aman, Y. *et al.* Autophagy in healthy aging and disease. *Nature Aging* **1**, 634-650,  
800 doi:10.1038/s43587-021-00098-4 (2021).
- 801 47 Salz, H. K. & Erickson, J. W. Sex determination in *Drosophila*: The view from the top.  
802 *Fly* **4**, 60-70, doi:10.4161/fly.4.1.11277 (2010).
- 803 48 Hudry, B., Khadayate, S. & Miguel-Aliaga, I. The sexual identity of adult intestinal  
804 stem cells controls organ size and plasticity. *Nature* **530**, 344-348,  
805 doi:10.1038/nature16953 (2016).
- 806 49 Leader, D. P., Krause, S. A., Pandit, A., Davies, S. A. & Dow, J. A. T. FlyAtlas 2: a new  
807 version of the *Drosophila melanogaster* expression atlas with RNA-Seq, miRNA-Seq  
808 and sex-specific data. *Nucleic Acids Res* **46**, D809-D815, doi:10.1093/nar/gkx976  
809 (2018).
- 810 50 Liang, J., Balachandra, S., Ngo, S. & O'Brien, L. E. Feedback regulation of steady-state  
811 epithelial turnover and organ size. *Nature* **548**, 588-591, doi:10.1038/nature23678  
812 (2017).
- 813 51 Reiff, T. *et al.* Endocrine remodelling of the adult intestine sustains reproduction in  
814 *Drosophila*. *eLife* **4**, e06930, doi:10.7554/eLife.06930 (2015).

- 815 52 Hudry, B. *et al.* Sex Differences in Intestinal Carbohydrate Metabolism Promote Food  
816 Intake and Sperm Maturation. *Cell* **178**, 901-918 e916, doi:10.1016/j.cell.2019.07.029  
817 (2019).
- 818 53 Fontana, L. & Partridge, L. Promoting health and longevity through diet: from model  
819 organisms to humans. *Cell* **161**, 106-118, doi:10.1016/j.cell.2015.02.020 (2015).
- 820 54 Millington, J. W., Brownrigg, G. P., Basner-Collins, P. J., Sun, Z. & Rideout, E. J. Genetic  
821 manipulation of insulin/insulin-like growth factor signaling pathway activity has sex-  
822 biased effects on *Drosophila* body size. *G3* **11**, doi:10.1093/g3journal/jkaa067 (2021).
- 823 55 Graze, R. M., Tzeng, R. Y., Howard, T. S. & Arbeitman, M. N. Perturbation of IIS/TOR  
824 signaling alters the landscape of sex-differential gene expression in *Drosophila*. *BMC*  
825 *Genomics* **19**, 893, doi:10.1186/s12864-018-5308-3 (2018).
- 826 56 Lamming, D. W. Diminished mTOR signaling: a common mode of action for endocrine  
827 longevity factors. *Springerplus* **3**, 735, doi:10.1186/2193-1801-3-735 (2014).
- 828 57 Arriola Apelo, S. I. *et al.* Ovariectomy uncouples lifespan from metabolic health and  
829 reveals a sex-hormone-dependent role of hepatic mTORC2 in aging. *eLife* **9**,  
830 doi:10.7554/eLife.56177 (2020).
- 831 58 Regan, J. C., Lu, Y.-X., Bolukbasi, E., Khericha, M. & Partridge, L. Ras inhibition by  
832 trametinib treatment in *Drosophila*; attenuates gut pathology  
833 in females and extends lifespan in both sexes. *bioRxiv*, 356295, doi:10.1101/356295  
834 (2018).
- 835 59 Resnik-Docampo, M. *et al.* Tricellular junctions regulate intestinal stem cell behaviour  
836 to maintain homeostasis. *Nature cell biology* **19**, 52-59, doi:10.1038/ncb3454 (2017).
- 837 60 Salazar, A. M. *et al.* Intestinal Snakeskin Limits Microbial Dysbiosis during Aging and  
838 Promotes Longevity. *iScience* **9**, 229-243, doi:10.1016/j.isci.2018.10.022 (2018).
- 839 61 Bolukbasi, E. *et al.* Intestinal Fork Head Regulates Nutrient Absorption and Promotes  
840 Longevity. *Cell reports* **21**, 641-653, doi:10.1016/j.celrep.2017.09.042 (2017).
- 841 62 Nagai, H., Tatara, H., Tanaka-Furuhashi, K., Kurata, S. & Yano, T. Homeostatic  
842 Regulation of ROS-Triggered Hippo-Yki Pathway via Autophagic Clearance of  
843 Ref(2)P/p62 in the *Drosophila* Intestine. *Dev Cell* **56**, 81-94 e10,  
844 doi:10.1016/j.devcel.2020.12.007 (2021).
- 845 63 Reglero-Real, N. *et al.* Autophagy modulates endothelial junctions to restrain  
846 neutrophil diapedesis during inflammation. *Immunity*,  
847 doi:10.1016/j.immuni.2021.07.012 (2021).
- 848 64 Clough, E. *et al.* Sex- and tissue-specific functions of *Drosophila* doublesex  
849 transcription factor target genes. *Developmental cell* **31**, 761-773,  
850 doi:10.1016/j.devcel.2014.11.021 (2014).
- 851 65 Kirkwood, T. B. Evolution of ageing. *Nature* **270**, 301-304, doi:10.1038/270301a0  
852 (1977).
- 853 66 Ahmed, S. M. H. *et al.* Fitness trade-offs incurred by ovary-to-gut steroid signalling in  
854 *Drosophila*. *Nature* **584**, 415-419, doi:10.1038/s41586-020-2462-y (2020).
- 855 67 Mirth, C. K., Nogueira Alves, A. & Piper, M. D. Turning food into eggs: insights from  
856 nutritional biology and developmental physiology of *Drosophila*. *Curr Opin Insect Sci*  
857 **31**, 49-57, doi:10.1016/j.cois.2018.08.006 (2019).
- 858 68 Regan, J. C., Froy, H., Walling, C. A., Moatt, J. P. & Nussey, D. H. Dietary restriction  
859 and insulin-like signalling pathways as adaptive plasticity: A synthesis and re-  
860 evaluation. *Functional Ecology* **34**, 107-128, doi:[https://doi.org/10.1111/1365-](https://doi.org/10.1111/1365-2435.13418)  
861 [2435.13418](https://doi.org/10.1111/1365-2435.13418) (2020).

- 862 69 Bonfini, A. *et al.* Multiscale analysis reveals that diet-dependent midgut plasticity  
863 emerges from alterations in both stem cell niche coupling and enterocyte size. *Elife*  
864 **10**, doi:10.7554/eLife.64125 (2021).
- 865 70 Millington, J. W. *et al.* Female-biased upregulation of insulin pathway activity  
866 mediates the sex difference in *Drosophila* body size plasticity. *eLife* **10**,  
867 doi:10.7554/eLife.58341 (2021).
- 868 71 Simpson, S. J. *et al.* Dietary protein, aging and nutritional geometry. *Ageing Res Rev*  
869 **39**, 78-86, doi:10.1016/j.arr.2017.03.001 (2017).
- 870 72 Piper, M. D., Partridge, L., Raubenheimer, D. & Simpson, S. J. Dietary restriction and  
871 aging: a unifying perspective. *Cell metabolism* **14**, 154-160,  
872 doi:10.1016/j.cmet.2011.06.013 (2011).
- 873 73 Pennell, T. M. & Morrow, E. H. Two sexes, one genome: the evolutionary dynamics of  
874 intralocus sexual conflict. *Ecol Evol* **3**, 1819-1834, doi:10.1002/ece3.540 (2013).
- 875 74 Oliván, S., Calvo, A. C., Manzano, R., Zaragoza, P. & Osta, R. Sex differences in  
876 constitutive autophagy. *Biomed Res Int* **2014**, 652817, doi:10.1155/2014/652817  
877 (2014).
- 878 75 Campesi, I., Straface, E., Occhioni, S., Montella, A. & Franconi, F. Protein oxidation  
879 seems to be linked to constitutive autophagy: a sex study. *Life Sci* **93**, 145-152,  
880 doi:10.1016/j.lfs.2013.06.001 (2013).
- 881 76 Congdon, E. E. Sex Differences in Autophagy Contribute to Female Vulnerability in  
882 Alzheimer's Disease. *Front Neurosci* **12**, 372, doi:10.3389/fnins.2018.00372 (2018).
- 883 77 Austad, S. N. Diverse aging rates in metazoans: targets for functional genomics.  
884 *Mechanisms of ageing and development* **126**, 43-49, doi:10.1016/j.mad.2004.09.022  
885 (2005).
- 886 78 Ren, C., Finkel, S. E. & Tower, J. Conditional inhibition of autophagy genes in adult  
887 *Drosophila* impairs immunity without compromising longevity. *Experimental*  
888 *gerontology* **44**, 228-235, doi:10.1016/j.exger.2008.10.002 (2009).
- 889 79 Scott, R. C., Schuldiner, O. & Neufeld, T. P. Role and regulation of starvation-induced  
890 autophagy in the *Drosophila* fat body. *Developmental cell* **7**, 167-178,  
891 doi:10.1016/j.devcel.2004.07.009 (2004).
- 892 80 Guo, L., Karpac, J., Tran, S. L. & Jasper, H. PGRP-SC2 promotes gut immune  
893 homeostasis to limit commensal dysbiosis and extend lifespan. *Cell* **156**, 109-122,  
894 doi:10.1016/j.cell.2013.12.018 (2014).
- 895 81 Broughton, S. J. *et al.* Longer lifespan, altered metabolism, and stress resistance in  
896 *Drosophila* from ablation of cells making insulin-like ligands. *Proceedings of the*  
897 *National Academy of Sciences of the United States of America* **102**, 3105-3110,  
898 doi:10.1073/pnas.0405775102 (2005).
- 899 82 Li, W. *et al.* A genetic screen in *Drosophila* reveals an unexpected role for the KIP1  
900 ubiquitination-promoting complex in male fertility. *PLoS Genet* **16**, e1009217,  
901 doi:10.1371/journal.pgen.1009217 (2020).
- 902
